# Supplementary material for: Interferon-Induced Protein 44 Interacts with Cellular FK506-Binding Protein 5, Negatively Regulates Host Antiviral Responses, and Supports Virus Replication
Source: PubMed Central journal article supplement (PMC6712396; doi:10.1128/mbio.01839-19), 2019-08-27

# FIGURE S2

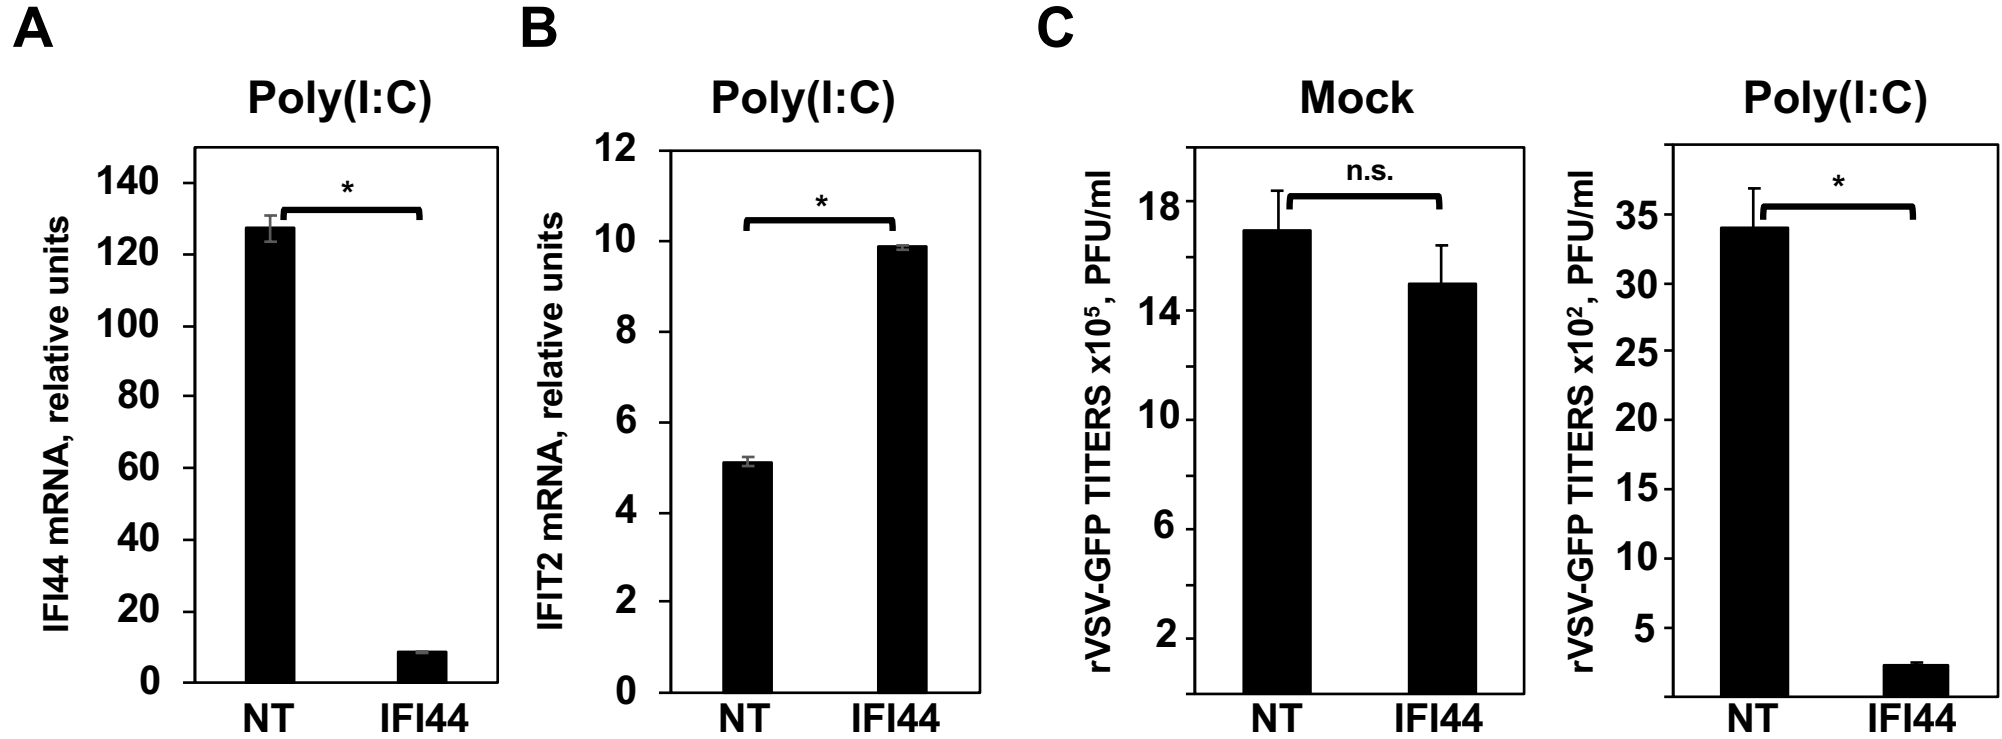

Supplement: mBio.01839-19-sf002.pdf [file mBio.01839-19-sf002.pdf]
